# Supplementary material for: Integrated genomics and comprehensive validation reveal drivers of genomic evolution in esophageal adenocarcinoma
Source: PubMed Central journal article supplement (PMC8144613; doi:10.1038/s42003-021-02125-x), 2021-05-24
Supplement: 42003_2021_2125_MOESM2_ESM.pdf [file 42003_2021_2125_MOESM2_ESM.pdf]

**SUPPLEMENTARY MATERIAL:**

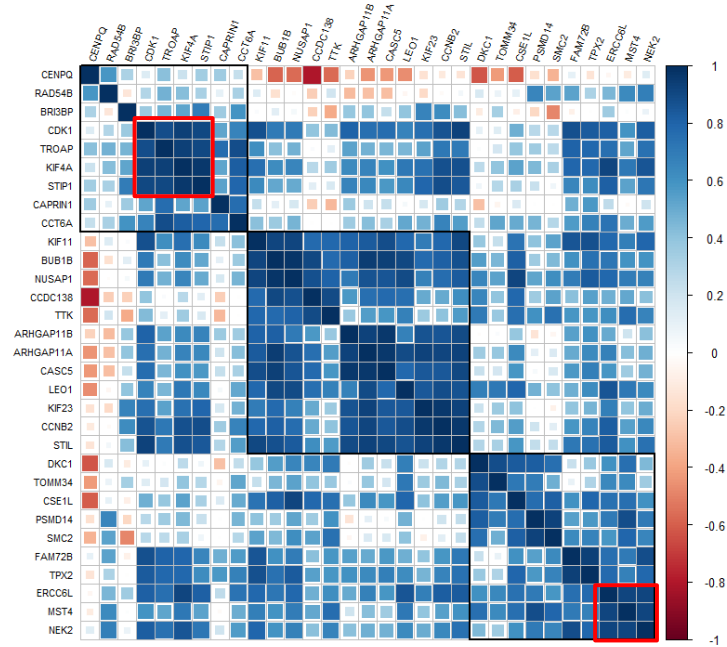

**Supplementary Figure 1. Co-upregulated GIS31 genes in EAC.** GIS31 genes in EAC patient dataset (from TCGA) were analyzed by a pairwise correlation of their expression, using Pearson method.

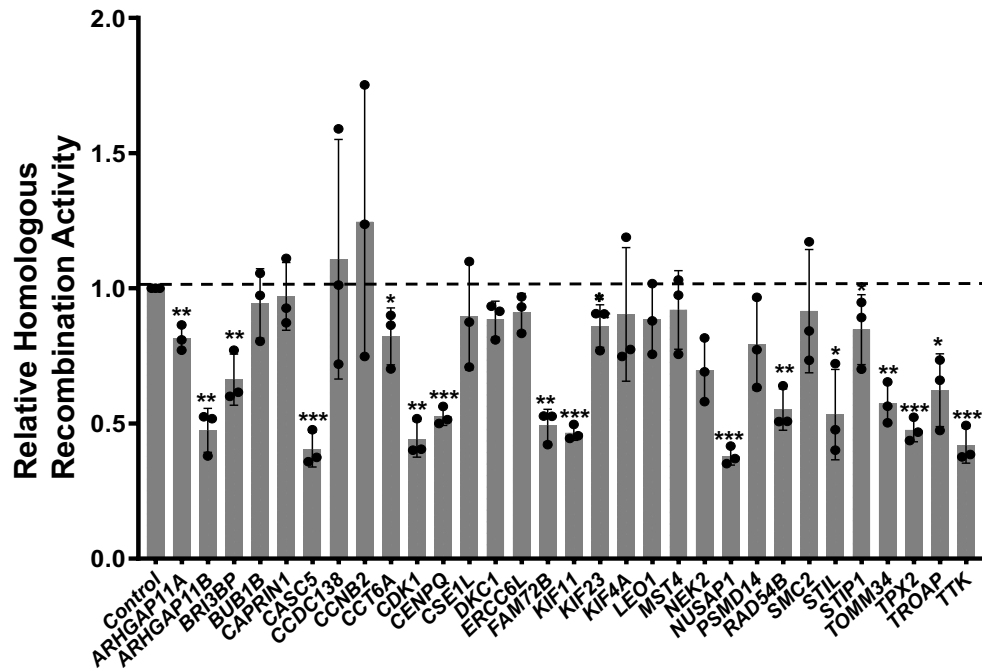

**Supplementary Figure 2. Functional siRNA screen evaluating GIS31 genes for impact on homologous recombination (HR) activity in EAC cells.** EAC (FLO1) cells were transfected with siRNAs, either control (non-targeting) or those targeting 31 potential genomic instability (GIS31) genes, and impact on homologous recombination assessed using strand exchange assay described in Methods section. Bar graphs show percent inhibition of homologous recombination activity; error bars represent SDs of three independent experiments. Two-tailed p-values, indicating significance of difference relative to control siRNA-transfected cells, are shown as: \* < 0.05 – > 0.005; \*\* < 0.005 – > 0.0001; \*\*\* < 0.0001 – < 0.000005.

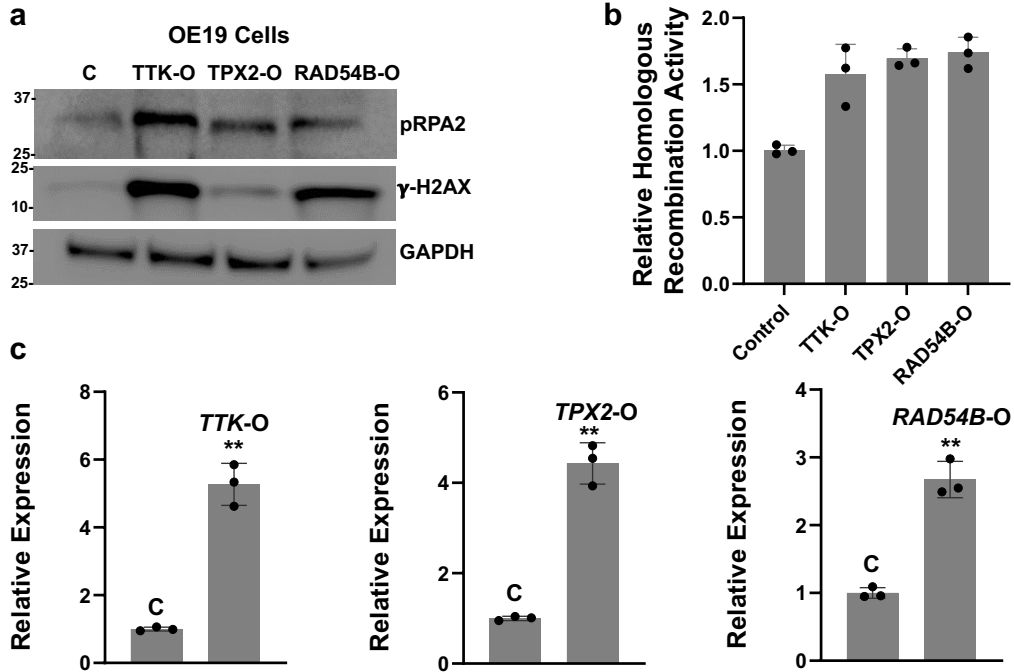

**Supplementary Figure 3. Overexpression of *TTK*, *TPX2* and *RAD54B* increases DNA breaks and homologous recombination activity in EAC (OE19) cells.** (a-b) OE19 cells were transfected with control plasmid (C) or those overexpressing *TTK* (*TTK-O*), *TPX2* (*TPX2-O*) or *RAD54B* (*RAD54B-O*), selected in puromycin and evaluated for  $\gamma$ -H2AX and phosphorylated-RPA32, using Western blotting (a), and homologous recombination activity, using a plasmid-based assay (b). Error bars indicate SDs of experiments conducted in triplicate; Two-tailed p values: = p < 0.5; (c) The transgene overexpression confirmed by Q-PCR.



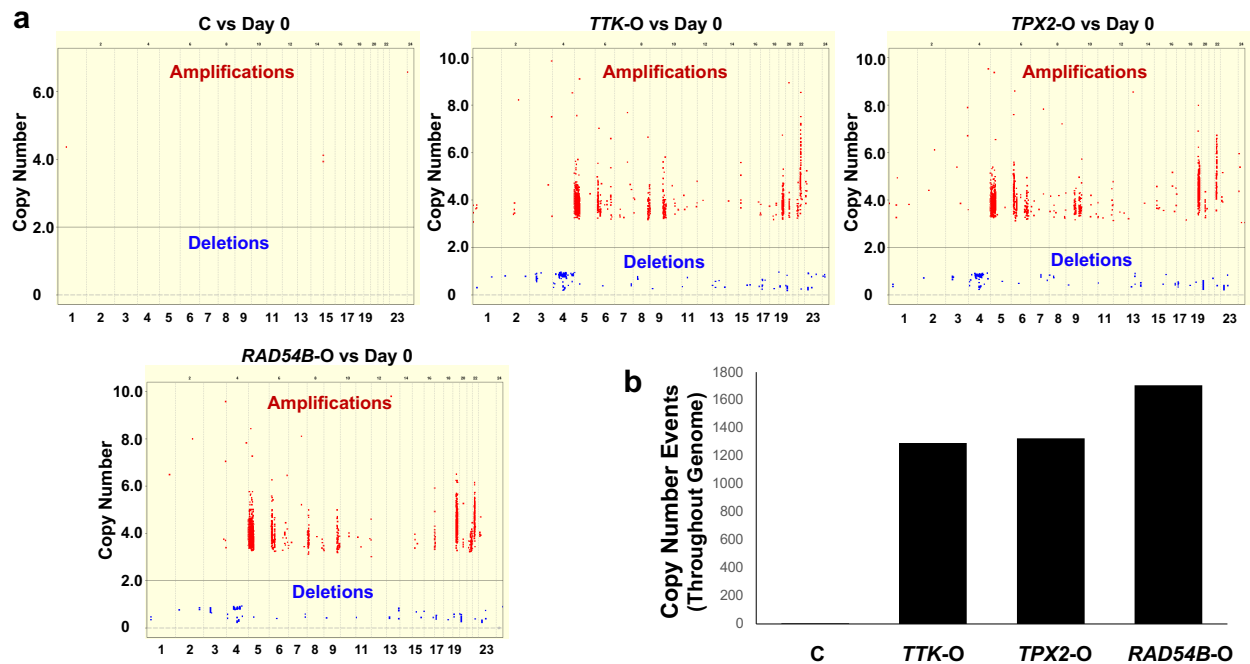

**Supplementary Figure 5. Overexpression of *TTK*, *TPX2* and *RAD54B* in normal primary esophageal cells induces the acquisition of new copy number changes over time.** Normal primary human esophageal epithelial cells (HEsEpi; ScienCell) were transfected with control plasmid (C) or those overexpressing *TTK* (*TTK-O*), *TPX2* (*TPX2-O*) or *RAD54B* (*RAD54B-O*), selected in puromycin and cultured for thirty days. DNA from these and baseline control (day 0) cells was purified and acquisition of copy number events during growth of cells in culture vs. day 0 cells (representing baseline genome) monitored, using SNP6.0 arrays (Affymetrix); a copy event was defined as a change in  $\geq 5$  consecutive CNV probes by 1 copy. **(a)** Images showing copy number events, as red (amplification) and blue (deletion) dots on all chromosomes, in cultured relative to baseline (day 0) cells; **(b)** Bar graph showing total copy-number change events, throughout genome.

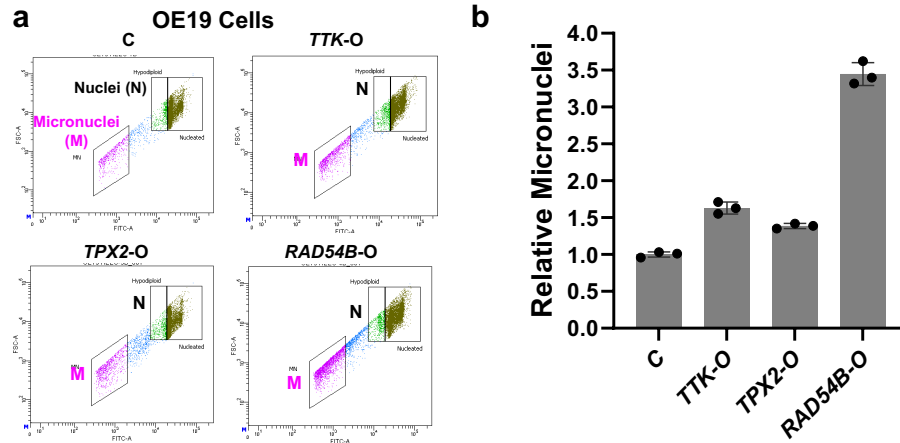

**Supplementary Figure 6. Overexpression of *TTK*, *TPX2* and *RAD54B* increases genomic instability in EAC (OE19) cells.** OE19 cells were transfected with control plasmid (C) or those overexpressing *TTK* (*TTK-O*), *TPX2* (*TPX2-O*) or *RAD54B* (*RAD54B-O*), selected in puromycin and evaluated for micronuclei, a marker of genomic instability. Flow cytometry images of micronuclei (a) and bar graphs showing percentage of micronuclei (b) are shown.

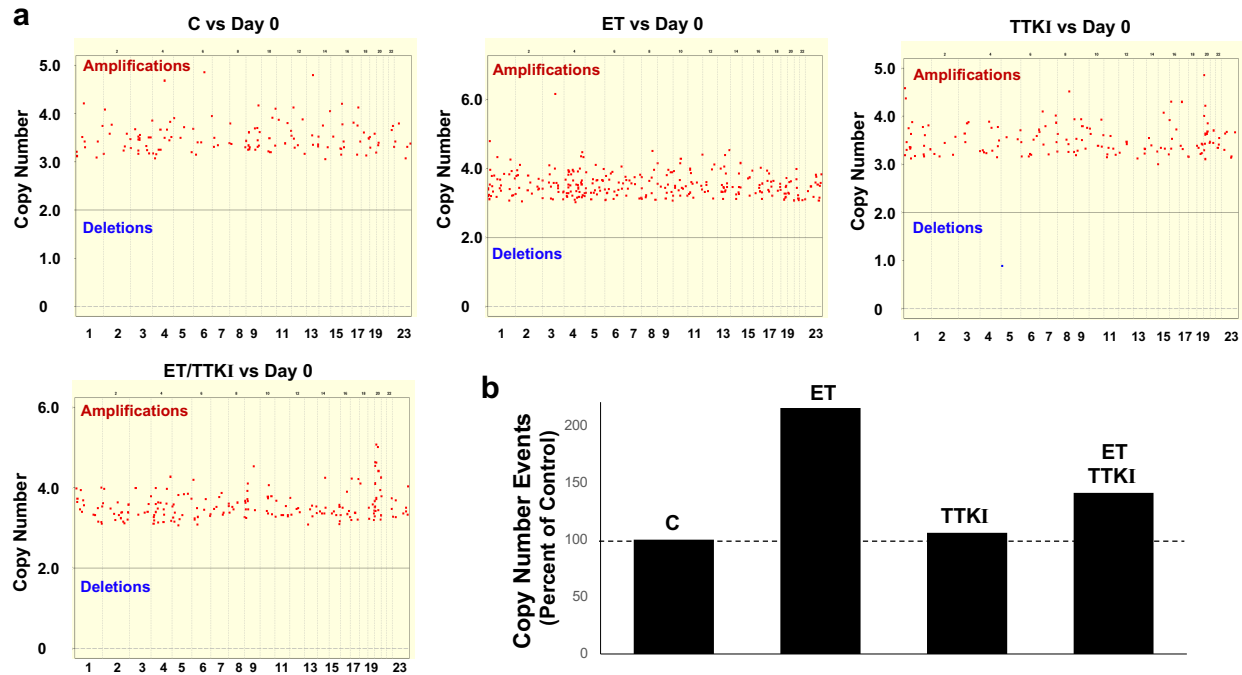

**Supplementary Figure 7. TTK inhibitor reduces etoposide-induced acquisition of copy number events in EAC cells.** FLO-1 cells, control (C; DMSO only) or those treated with TTK inhibitor (TTK-I; 10 nM) and etoposide (ET; 1  $\mu$ M), alone as well as in combination with each other for 3 weeks. DNA from these and baseline control (day 0) cells was purified and acquisition of copy number events during growth of cells in culture vs. day 0 cells (representing baseline genome) monitored, using Axiom™ Precision Medicine Diversity Arrays; a copy event was defined as a change in  $\geq 3$  consecutive CNV probes by 1 copy. **(a)** Amplifications (red dots) and deletions (blue dots) on different chromosomes; **(b)** Bar graph showing copy number events throughout genome.

**Supplementary Table 1. Known functions of GIS31 genes.**

| <b>Gene Name</b> | <b>Family</b>                                 | <b>Function/Pathway</b>                                | <b>Ref. #</b> |
|------------------|-----------------------------------------------|--------------------------------------------------------|---------------|
| ARHGAP11A        | Rho GTPase                                    | Cell cycle, DNA damage response                        | 1             |
| ARHGAP11B        | Rho GTPase                                    | Brain Development                                      | 2             |
| BRI3BP           | BRI3 binding protein                          | Involved in tumorigenesis                              | 3             |
| BUB1B            | Serine/Threonine Kinase B                     | Mitotic checkpoint kinase                              | 4             |
| CAPRN1           | Cell Cycle Associated Protein                 | Cell proliferation                                     | 5             |
| CASC5            | Kinetochores protein                          | Cell cycle regulation                                  | 6             |
| CCDC138          | Coiled-coil domain-containing                 | Unknown                                                |               |
| CCNB2            | B-type cyclins                                | G2/M Cell cycle regulation                             | 7             |
| CCT6A            | Chaperonin protein                            | Protein folding                                        | 8             |
| CDK1             | Cyclin dependent kinase                       | G2/M Cell cycle regulation                             | 9             |
| CENPQ            | Centromere protein                            | Regulation of mitosis                                  | 10            |
| CSE1L            | Nuclear export factor                         | Cell cycle and genomic instability                     | 11            |
| DKC1             | Small nucleolar ribonucleoprotein             | Cell cycle                                             | 12            |
| ERCC6L           | Mitotic helicase                              | Mitosis checkpoint regulation                          | 13            |
| FAM72B           | Family with sequence similarity 72            | Cell cycle regulation                                  | 14            |
| KIF11            | Kinetochores associated protein               | Mitosis checkpoint regulation                          | 15            |
| KIF23            | Kinetochores associated protein               | Mitosis checkpoint regulation                          | 15            |
| KIF4A            | Kinetochores associated protein               | Mitosis checkpoint regulation                          | 15            |
| LEO1             | RNA polymerase II associated factor Paf1      | Oncogene                                               | 16            |
| MST4             | Serine/threonine protein kinase               | Promote cell growth and transformation                 | 17            |
| NEK2             | Mitotic kinase                                | Cancer progression                                     | 18            |
| NUSAP1           | Nucleolar & spindle associated                | Promote cancer progression                             | 19            |
| PSMD14           | Deubiquitinating enzyme                       | Promote tumor metastasis                               | 20            |
| RAD54B           | DNA repair and recombination protein          | Promotes homologous recombination                      | 21            |
| SMC2             | Structural maintenance of chromosomes protein | Involved in DNA repair pathway and genomic instability | 22            |
| STIL             | Centriolar replication factor                 | Involved in DNA damage response                        | 23            |
| STIP1            | Stress induced phosphoprotein                 | Tumor growth, metastasis                               | 24            |
| TOMM34           | Mitochondrial import receptor                 | Promotes cancer growth                                 | 25            |
| TPX2             | Microtubule-associated protein                | Genomic instability, cancer                            | 26            |
| TROAP            | Cytoskeleton, spindle assembly                | Cancer and metastasis                                  | 27            |
| TTK              | Mitotic kinase                                | Homologous recombination and cancer growth             | 28            |



## SUPPLEMENTARY REFERENCES:

1. Kagawa Y, Matsumoto S, Kamioka Y, Mimori K, Naito Y, Ishii T, Okuzaki D, Nishida N, Maeda S, Naito A, Kikuta J, Nishikawa K, Nishimura J, Haraguchi N, Takemasa I, Mizushima T, Ikeda M, Yamamoto H, Sekimoto M, Ishii H, Doki Y, Matsuda M, Kikuchi A, Mori M, Ishii M. Cell cycle-dependent Rho GTPase activity dynamically regulates cancer cell motility and invasion in vivo. *PLoS One*. 2013 Dec 30;8(12):e83629. doi: 10.1371/journal.pone.0083629. eCollection 2013. PMID: 24386239
2. Florio M, Albert M, Taverna E, Namba T, Brandl H, Lewitus E, Haffner C, Sykes A, Wong FK, Peters J, Guhr E, Klemroth S, Prüfer K, Kelso J, Naumann R, Nüsslein I, Dahl A, Lachmann R, Pääbo S, Huttner WB. Human-specific gene ARHGAP11B promotes basal progenitor amplification and neocortex expansion. *Science*. 2015 Mar 27; 347(6229):1465-70.
3. Ha SA, Shin S.M., Lee Y.J., Kim S., Kim H.K., Namkoong H., Lee H., Lee Y.S., Cho Y.S., Park Y.G., Jeon H.M., Oh C., Kim J.W. HCCRBP-1 directly interacting with HCCR-1 induces tumorigenesis through P53 stabilization *Int. J. Cancer* 122:501-508(2008)
4. Hanks S, Coleman K, Reid S, Plaja A, Firth H, Fitzpatrick D, Kidd A, Méhes K, Nash R, Robin N, Shannon N, Tolmie J, Swansbury J, Irrthum A, Douglas J, Rahman N. Constitutional aneuploidy and cancer predisposition caused by biallelic mutations in BUB1B. *Nat Genet*. 2004 Nov;36(11):1159-61.
5. Wang, B., David, M. D., Schrader, J. W. Absence of Caprin-1 results in defects in cellular proliferation. *J. Immun.* 175: 4274-4282, 2005.
6. Genin, A., Desir, J., Lambert, N., Biervliet, M., Van Der Aa, N., Pierquin, G., Killian, A., Tosi, M., Urbina, M., Lefort, A., Libert, F., Pirson, I., Abramowicz, M. Kinetochores KMN network gene CASC5 mutated in primary microcephaly. *Hum. Molec. Genet.* 21: 5306-5317, 2012.
7. Nam, H.-J., van Deursen, J. M. Cyclin B2 and p53 control proper timing of centrosome separation. *Nature Cell Biol.* 16: 535-546, 2014.
8. Li WZ, Lin P, Frydman J, Boal TR, Cardillo TS, Richard LM, Toth D, Lichtman MA, Hartl FU, Sherman F (August 1994). "Tc20, a subunit of the eukaryotic TRiC chaperonin from humans and yeast". *J Biol Chem.* 269 (28): 18616–22. PMID 8034610
9. Santamaría D, Barrière C, Cerqueira A, et al. Cdk1 is sufficient to drive the mammalian cell cycle. *Nature*. 2007;448(7155):811-815. doi:10.1038/nature06046
10. Okada, M., Cheeseman, I. M., Hori, T., Okawa, K., McLeod, I. X., Yates, J. R., III, Desai, A., Fukagawa, T. The CENP-H-I complex is required for the efficient incorporation of newly synthesized CENP-A into centromeres. *Nature Cell Biol.* 8: 446-457, 2006.

11. Wellmann, A., Flemming, P., Behrens, P., Wuppermann, K., Lang, H., Oldhafer, K., Pastan, I., Brinkmann, U. High expression of the proliferation and apoptosis associated CSE1L/CAS gene in hepatitis and liver neoplasms: correlation with tumor progression. *Int. J. Mol. Med.* (2001)
12. Heiss NS, Knight SW, Vulliamy TJ, et al. X-linked dyskeratosis congenita is caused by mutations in a highly conserved gene with putative nucleolar functions. *Nat Genet.* 1998;19(1):32-38
13. Baumann, C., Korner, R., Hofmann, K., Nigg, E. A. PICH, a centromere-associated SNF2 family ATPase, is regulated by Plk1 and required for the spindle checkpoint. *Cell* 128: 101-114, 2007.
14. Rahane CS, Kutzner A, Heese K. A cancer tissue-specific FAM72 expression profile defines a novel glioblastoma multiform (GBM) gene-mutation signature. *J Neurooncol.* 2019;141(1):57-70.
15. Liu X, Gong H, Huang K. Oncogenic role of kinesin proteins and targeting kinesin therapy *Cancer Sci.* 2013 Jun;104(6):651-6.
16. Chong PS, Zhou J, Cheong LL, et al. LEO1 is regulated by PRL-3 and mediates its oncogenic properties in acute myelogenous leukemia. *Cancer Res.* 2014;74(11):3043-3053. doi:10.1158/0008-5472.CAN-13-2321
17. Ma X, Zhao H, Shan J, Long F, Chen Y, Chen Y, Zhang Y, Han X, Ma D (2007). "PDCD10 interacts with Ste20-related kinase MST4 to promote cell growth and transformation via modulation of the ERK pathway". *Mol. Biol. Cell.* 18 (6): 1965–78. doi:10.1091/mbc.E06-07-0608
18. Fang Y, Zhang X. Targeting NEK2 as a promising therapeutic approach for cancer treatment. *Cell Cycle.* 2016;15(7):895-907. doi:10.1080/15384101.2016.1152430
19. Gordon CA, Gong X, Ganesh D, Brooks JD. NUSAP1 promotes invasion and metastasis of prostate cancer. *Oncotarget.* 2017;8(18):29935-29950. doi:10.18632/oncotarget.15604
20. Zhu R, Liu Y, Zhou H, et al. Deubiquitinating enzyme PSMD14 promotes tumor metastasis through stabilizing SNAIL in human esophageal squamous cell carcinoma. *Cancer Lett.* 2018;418:125-134. doi:10.1016/j.canlet.2018.01.025
21. Yasuhara T, Suzuki T, Katsura M, Miyagawa K. Rad54B serves as a scaffold in the DNA damage response that limits checkpoint strength. *Nat Commun.* 2014;5:5426.
22. Wu N, Yu H. The Smc complexes in DNA damage response. *Cell Biosci.* 2012;2:5. Published 2012 Feb 27. doi:10.1186/2045-3701-2-5
23. Rabinowicz N, Mangala LS, Brown KR, et al. Targeting the centriolar replication factor STIL synergizes with DNA damaging agents for treatment of ovarian cancer. *Oncotarget.* 2017;8(16):27380-27392. doi:10.18632/oncotarget.16068

24. Sun X, Cao N, Mu L, Cao W. Stress induced phosphoprotein 1 promotes tumor growth and metastasis of melanoma via modulating JAK2/STAT3 pathway. *Biomed Pharmacother.* 2019;116:108962. doi:10.1016/j.biopha.2019.108962
25. Muller P, Coates PJ, Nenutil R, et al. Tomm34 is commonly expressed in epithelial ovarian cancer and associates with tumour type and high FIGO stage. *J Ovarian Res.* 2019;12(1):30. Published 2019 Mar 27. doi:10.1186/s13048-019-0498-0
26. van Gijn SE, Wierenga E, van den Tempel N, et al. TPX2/Aurora kinase A signaling as a potential therapeutic target in genomically unstable cancer cells. *Oncogene.* 2019;38(6):852-867. doi:10.1038/s41388-018-0470-2
27. Li K, Zhang R, Wei M, et al. TROAP Promotes Breast Cancer Proliferation and Metastasis. *Biomed Res Int.* 2019;2019:6140951. Published 2019 May 6. doi:10.1155/2019/6140951
28. Chandler BC, Moubadder L, Ritter CL, et al. TTK inhibition radiosensitizes basal-like breast cancer through impaired homologous recombination. *J Clin Invest.* 2020;130(2):958-973. doi:10.1172/JCI1130435
